# Supplementary material for: Reconstruction of the metabolic network of Pseudomonas aeruginosa to interrogate virulence factor synthesis
Source: PubMed Central journal article supplement (PMC5344303; doi:10.1038/ncomms14631), 2017-03-07
Supplement: ncomms14631-s1.pdf [file ncomms14631-s1.pdf]

## Supplementary Information

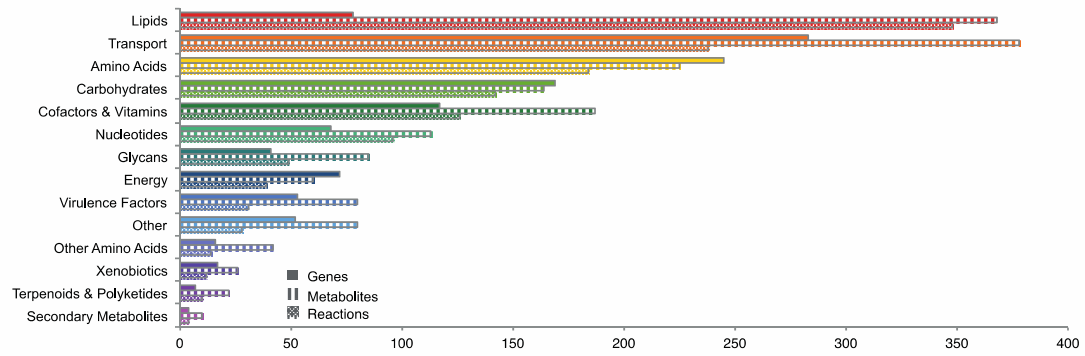

**Supplementary Figure 1. Network component distribution of mPAO1.** The distribution of the genes, metabolites and reactions in mPAO1 across KEGG functional categories.

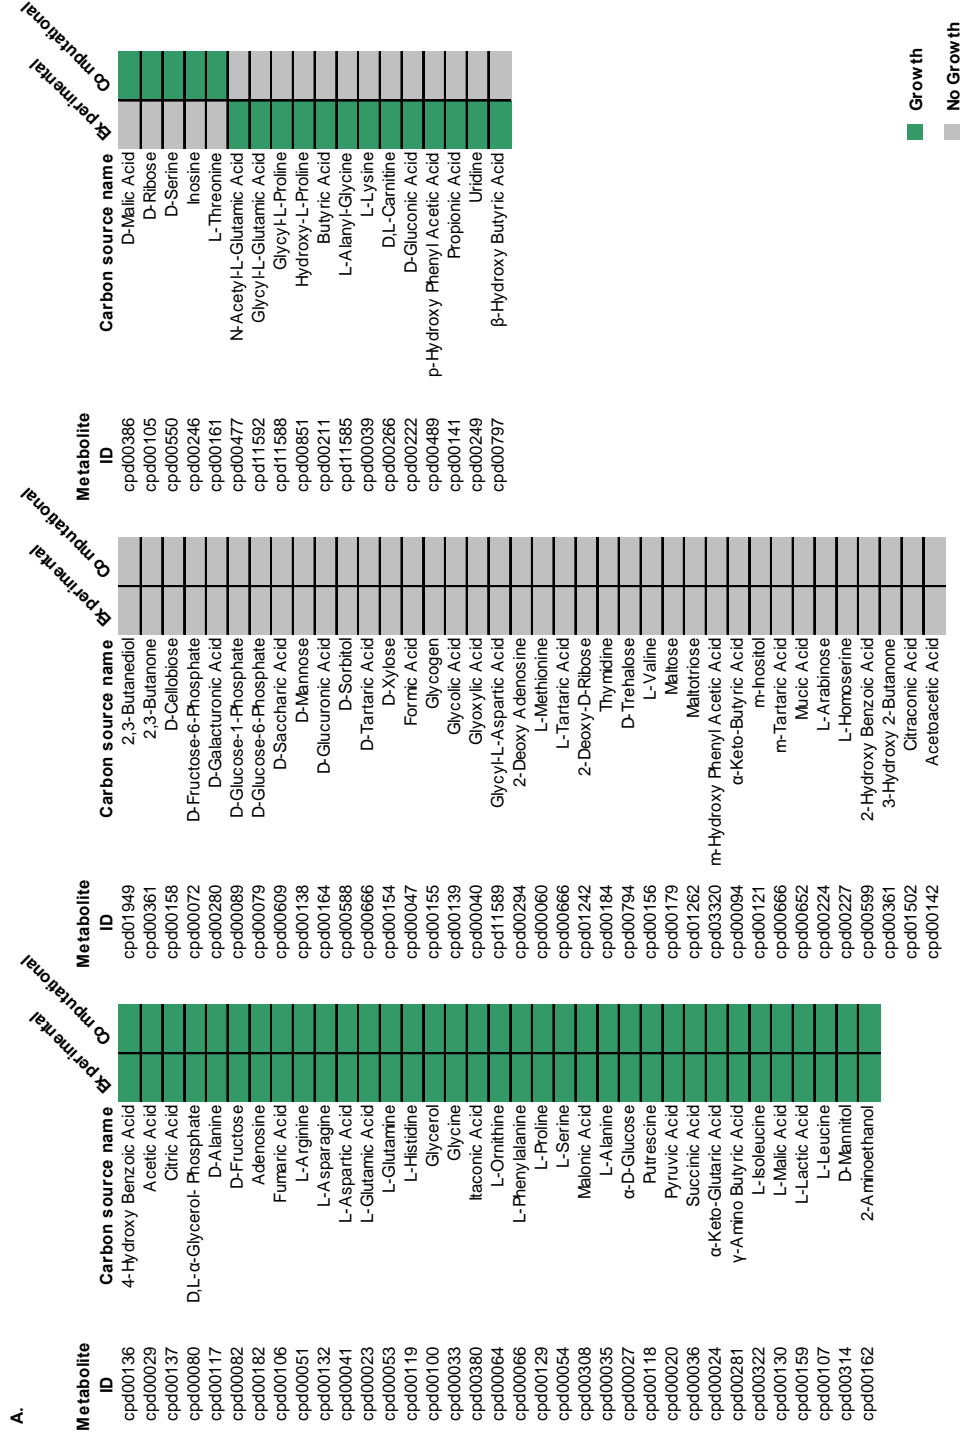

**Supplementary Figure 2. A) Comparison of experimental and computational single substrate source**

utilization for *P. aeruginosa* PA14. B) Comparison of experimental and computational single substrate

source utilization for *P. aeruginosa* PAO1.

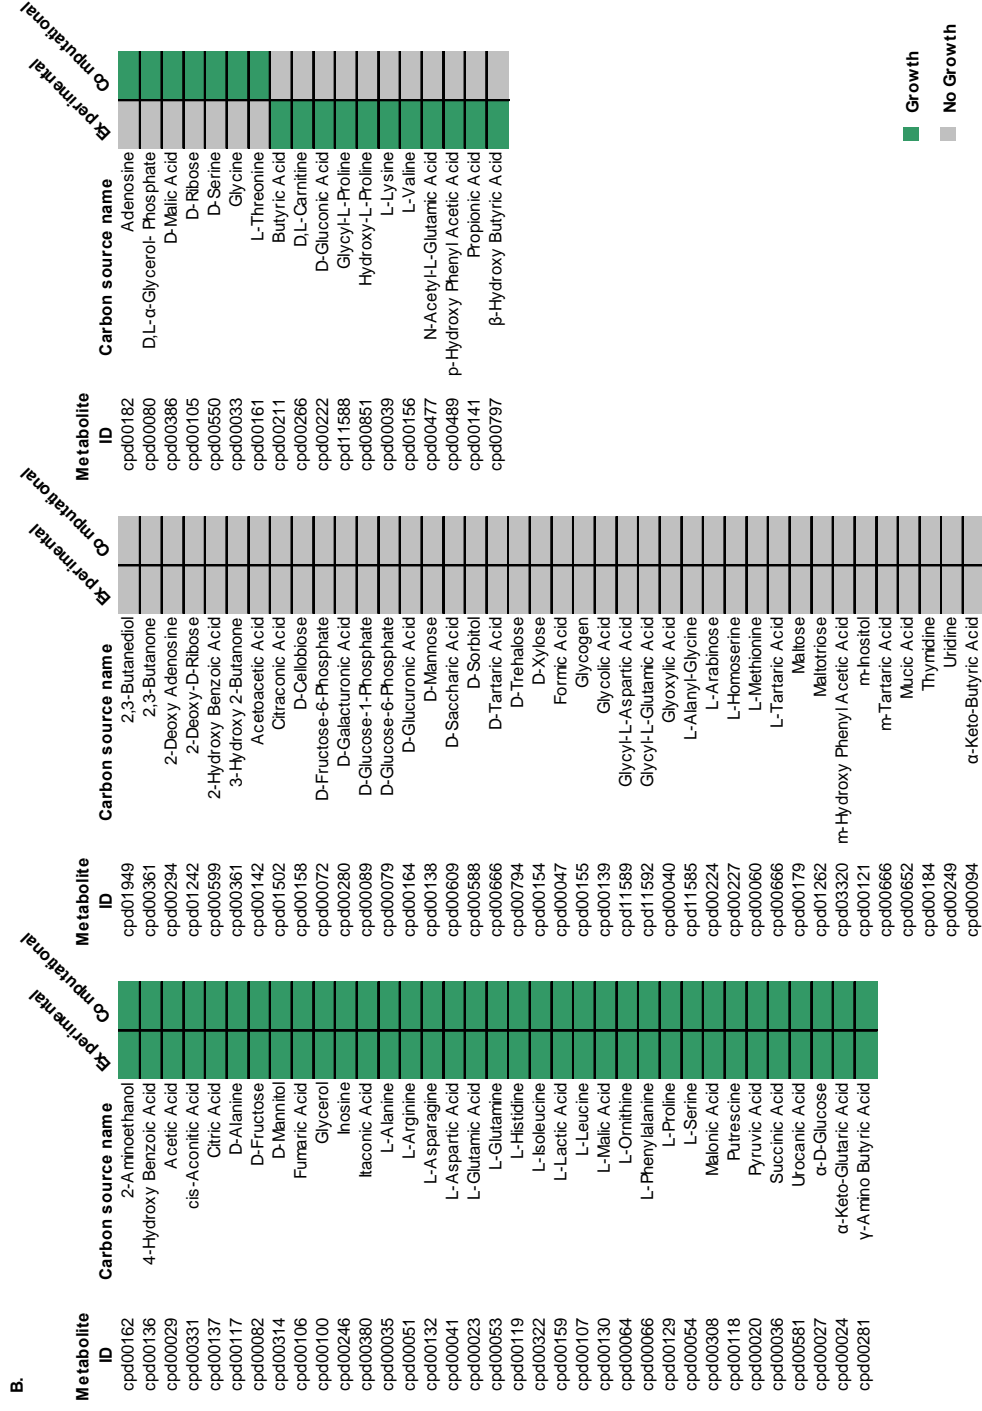

■ Growth  
■ No Growth

**Supplementary Figure 2.** A) Comparison of experimental and computational single substrate source utilization for *P. aeruginosa* PA14. B) Comparison of experimental and computational single substrate source utilization for *P. aeruginosa* PAO1.

**A.**

|                  |   | <i>in vitro</i>       |                       |                                     |
|------------------|---|-----------------------|-----------------------|-------------------------------------|
|                  |   | +                     | -                     |                                     |
| <i>in silico</i> | + | 110                   |                       |                                     |
|                  | - | 1022                  |                       |                                     |
|                  |   | 95                    | 1037                  |                                     |
|                  |   | True Positive<br>54   | False Positive<br>56  | Positive Predictive Value<br>49.09% |
|                  |   | False Negative<br>41  | True Negative<br>981  | Negative Predictive Value<br>95.99% |
|                  |   | Sensitivity<br>56.84% | Specificity<br>94.60% | Accuracy<br>91.43%                  |

**B.**

|                  |   | <i>in vitro</i>       |                       |                                     |
|------------------|---|-----------------------|-----------------------|-------------------------------------|
|                  |   | +                     | -                     |                                     |
| <i>in silico</i> | + | 110                   |                       |                                     |
|                  | - | 1038                  |                       |                                     |
|                  |   | 96                    | 1052                  |                                     |
|                  |   | True Positive<br>54   | False Positive<br>56  | Positive Predictive Value<br>49.09% |
|                  |   | False Negative<br>42  | True Negative<br>996  | Negative Predictive Value<br>95.95% |
|                  |   | Sensitivity<br>56.25% | Specificity<br>94.68% | Accuracy<br>91.46%                  |

**Supplementary Figure 3. Analysis of essential gene predictions compared to *in vitro* essentiality.** Overlap of essential genes derived from the PAO1 single transposon mutant library and PA14 single transposon mutant library were used. Both mPA14 (Panel A) and mPAO1 (Panel B) predict gene essentiality with an accuracy of 91%.
